# Supplementary material for: Development of an Aspen Plus® Model for the Process of Hydrogen Production by Black Liquor Electrolysis
Source: MDPI journal article supplement (doi:10.3390/sym14081676), 2022-08-12
Supplement: s1 [file s1]

Archive with 1 entries (1 files):
- symmetry-1829407-supplementary.pdf
