# Supplementary material for: Development of an Aspen Plus® Model for the Process of Hydrogen Production by Black Liquor Electrolysis
Source: MDPI journal article supplement (doi:10.3390/sym14081676), 2022-08-12
Supplement: s1 [file s1 › symmetry-1829407-supplementary.pdf]

# Development of an Aspen Plus® model for the process of hydrogen production by black liquor electrolysis

José R.M. Gonçalves<sup>1,2</sup>, Duarte M. Cecílio<sup>2</sup>, Raísa C.P. Oliveira<sup>1,2</sup>, Maria M. Mateus<sup>2</sup>, Diogo M.F. Santos<sup>1,\*</sup>

<sup>1</sup> Center of Physics and Engineering of Advanced Materials, Laboratory for Physics of Materials and Emerging Technologies, Chemical Engineering Department, Instituto Superior Técnico, Universidade de Lisboa, 1049-001 Lisbon, Portugal

<sup>2</sup> Center for Natural Resources and the Environment, Chemical Engineering Department, Instituto Superior Técnico, Universidade de Lisboa, 1049-001 Lisbon, Portugal

\* Correspondence: diogosantos@tecnico.ulisboa.pt

## Supplementary information

### Mass balance

The mass balance provided the information needed to simulate the BL electrolysis (Table S1). The mass balance was obtained through BL electrolysis in a laboratory cell with the following conditions:  $T = 25\text{ }^{\circ}\text{C}$ ,  $N = 1$ ,  $V_{\text{cell}} = 3.0\text{ V}$ ,  $P = 1\text{ bar}$ , and  $W_{\text{stack}} = 0.915\text{ W}$ . The cell worked in batch operation for 3 hours.

**Table S1.** Mass balance based on BL electrolysis in a laboratory cell.

| Component             |                                 | Inlet (g) | Outlet (g) |
|-----------------------|---------------------------------|-----------|------------|
| Anode: Nickel plate   |                                 | 20.650    | 20.076     |
| Cathode: Nickel plate |                                 | 20.507    | 20.507     |
| Black liquor          | H <sub>2</sub> O                | 264.720   | 264.454    |
|                       | NaOH                            | 3.574     | 3.574      |
|                       | Na <sub>2</sub> S               | 2.118     | 2.118      |
|                       | Na <sub>2</sub> SO <sub>4</sub> | 7.412     | 7.412      |
|                       | KOH                             | 10.920    | 10.920     |
|                       | K <sub>2</sub> CO <sub>3</sub>  | 0.199     | 0.199      |
|                       | K <sub>2</sub> SO <sub>4</sub>  | 0.596     | 0.596      |
|                       | Lignin                          | 4.798     | 4.598      |
|                       | Sugars                          | 2.214     | 2.214      |
|                       | Hydroxy-carboxylic acids        | 0.417     | 0.417      |
|                       | Acid Low MW volatiles           | 6.419     | 6.419      |
| Solid                 | Ni                              | 0         | 0.026      |
|                       | H <sub>2</sub>                  | 0         | 0.030      |
|                       | Ni                              | 0         | 0.548      |
|                       | O                               | 0         | 0.172      |
|                       | S                               | 0         | 0.103      |
| Total                 | Lignin                          | 0         | 0.200      |
|                       |                                 | 344.543   | 344.581    |

The following assumptions were made to obtain the mass balance: (i) the formed gas was pure hydrogen, and (ii) hydrogen came only from the water. Due to the components

simplifications described in section 2.3 of the paper, the mass balance used in Aspen Plus® is presented in Table S2.

**Table S2.** The mass balance used in Aspen Plus®.

| Component                       | Inlet (mol/h)          | Outlet (mol/h)         |
|---------------------------------|------------------------|------------------------|
| Ni (s)                          | 0.1173                 | 0.1140                 |
| H <sub>2</sub> O                | 4.902                  | 4.897                  |
| NaOH                            | 0.02978                | 0.02978                |
| Na <sup>+</sup>                 | 0.01810                | 0.01810                |
| S <sup>2-</sup>                 | 9.050×10 <sup>-3</sup> | 7.978×10 <sup>-3</sup> |
| Na <sub>2</sub> SO <sub>4</sub> | 0.01669                | 0.01669                |
| KOH                             | 0.06488                | 0.06488                |
| K <sub>2</sub> CO <sub>3</sub>  | 4.789×10 <sup>-4</sup> | 4.789×10 <sup>-4</sup> |
| K <sub>2</sub> SO <sub>4</sub>  | 1.139×10 <sup>-3</sup> | 1.139×10 <sup>-3</sup> |
| p-Coumaryl Alcohol              | 1.838×10 <sup>-3</sup> | 1.762×10 <sup>-3</sup> |
| Glucose                         | 4.095×10 <sup>-3</sup> | 4.095×10 <sup>-3</sup> |
| Citric Acid                     | 7.235×10 <sup>-4</sup> | 7.235×10 <sup>-3</sup> |
| Acetic Acid                     | 0.03560                | 0.03560                |
| H <sub>2</sub>                  | 0                      | 1.469×10 <sup>-4</sup> |
| Ni <sup>2+</sup>                | 0                      | 3.731×10 <sup>-3</sup> |
| O <sub>2</sub>                  | 0                      | 1.865×10 <sup>-3</sup> |
| Anthracene                      | 0                      | 7.680×10 <sup>-5</sup> |
| S                               | 0                      | 1.073×10 <sup>-3</sup> |
| Total                           | 5.202                  | 5.204                  |

From this mass balance, it is possible to extract useful information, such as the stoichiometric factors (Table S3).

**Table S3.** Stoichiometric factors for the different compounds.

| Compounds                       | Stoichiometric factors |
|---------------------------------|------------------------|
| Acetic Acid                     | 0                      |
| Citric Acid                     | 0                      |
| p-Coumaryl Alcohol              | −0.0155                |
| Anthracene                      | 0.0155                 |
| Glycose                         | 0                      |
| H <sub>2</sub>                  | 1                      |
| H <sub>2</sub> O                | −0.993                 |
| K <sub>2</sub> CO <sub>3</sub>  | 0                      |
| K <sub>2</sub> SO <sub>4</sub>  | 0                      |
| KOH                             | 0                      |
| Na <sub>2</sub> SO <sub>4</sub> | 0                      |
| Na <sup>+</sup>                 | 0                      |
| NaOH                            | 0                      |
| Ni                              | −0.656                 |
| Ni <sup>2+</sup>                | 0.751                  |
| O <sub>2</sub>                  | 0.376                  |
| S                               | 0.216                  |
| S <sup>2−</sup>                 | −0.216                 |

**Citation:** Gonçalves, J.R.M.; Cecílio, D.M.; Oliveira, R.C.P.; Mateus, M.M.; Santos, D.M.F. Development of an Aspen Plus® Model for the Process of Hydrogen Production by Black Liquor Electrolysis. *Symmetry* **2022**, *14*, 1676.  
<https://doi.org/10.3390/sym14081676>

Academic Editor: Weiguang Ma  
 Received: 6 July 2022  
 Accepted: 9 August 2022  
 Published: 12 August 2022

**Publisher's Note:** MDPI stays neutral with regard to jurisdictional claims in published maps and institutional affiliations.

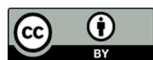

**Copyright:** © 2022 by the authors. Submitted for possible open access publication under the terms and conditions of the Creative Commons Attribution (CC BY) license (<https://creativecommons.org/licenses/by/4.0/>).

### Batch operation vs. continuous operation

Figures S1 and S2 compare the experimental data and the adjusted polarization curve, both for batch and continuous operation.

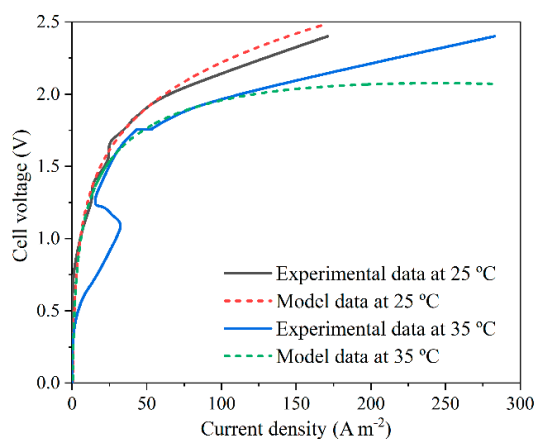

**Figure S1.** Comparison between experimental data and the model for batch simulation at 25 °C and 35 °C.

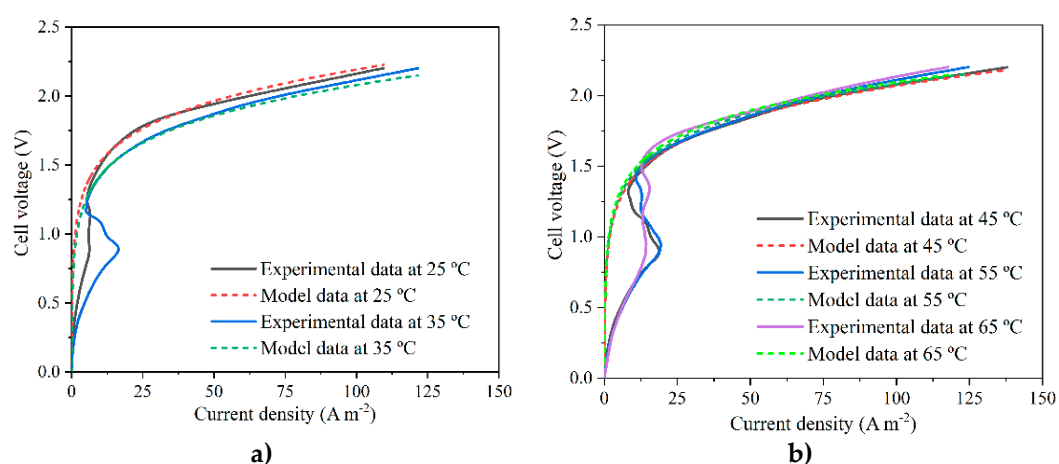

**Figure S2.** Comparison between experimental data and the model at different temperatures for continuous operation.

### Sensitivity analysis

This section shows the electrolyzer sensitivity analysis data to understand how each variable influences the others.

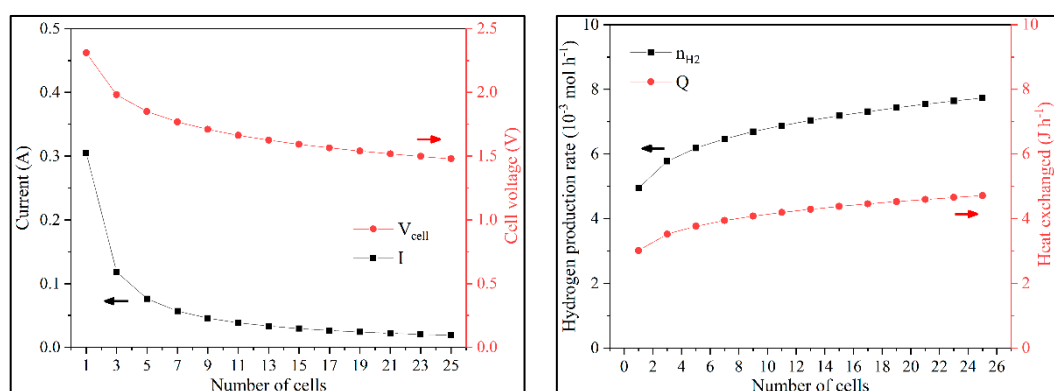

**Figure S3.** Variation of  $i$ ,  $V_{\text{cell}}$ ,  $n_{\text{H}_2}$ , and  $Q_{\text{T}}$  with  $N$  in continuous operation.

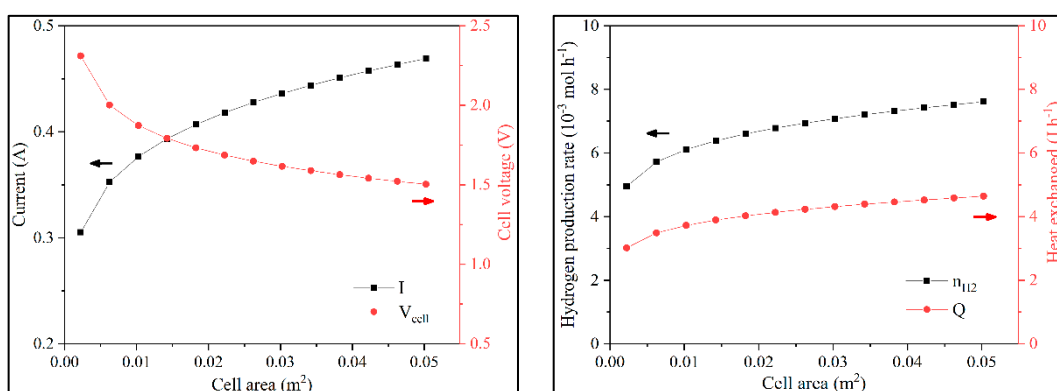

**Figure S4.** Variation of  $i$ ,  $V_{\text{cell}}$ ,  $n_{\text{H}_2}$ , and  $Q_{\text{T}}$  with  $A_{\text{cell}}$  in continuous operation.

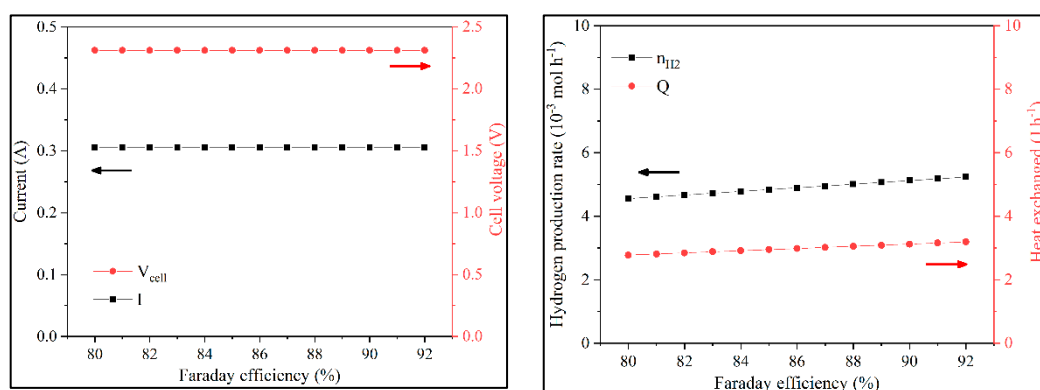

Figure S5. Variation of  $i$ ,  $V_{\text{cell}}$ ,  $n_{\text{H}_2}$ , and  $Q_T$  with the Faraday efficiency in continuous operation.

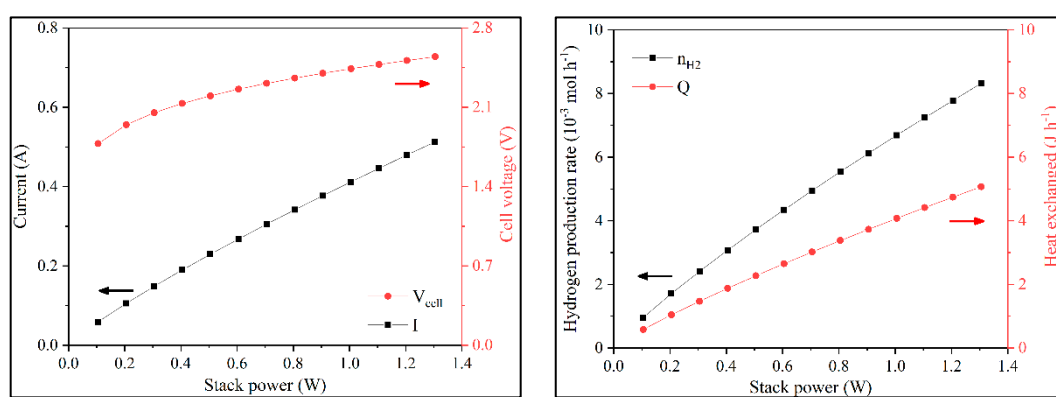

Figure S6. Variation of  $i$ ,  $V_{\text{cell}}$ ,  $n_{\text{H}_2}$ , and  $Q_T$  with the electric power in continuous operation.

Table S4. Sensitivity analysis for Faraday efficiency.

| Efficiency Increment (%) | Batch operation |                              |                             |                  | Continuous operation |                              |                             |                  |
|--------------------------|-----------------|------------------------------|-----------------------------|------------------|----------------------|------------------------------|-----------------------------|------------------|
|                          | $\Delta i$ (%)  | $\Delta V_{\text{cell}}$ (%) | $\Delta n_{\text{H}_2}$ (%) | $\Delta Q_T$ (%) | $\Delta i$ (%)       | $\Delta V_{\text{cell}}$ (%) | $\Delta n_{\text{H}_2}$ (%) | $\Delta Q_T$ (%) |
| -5.75                    | 0               | 0                            | -5.75                       | -5.75            | 0                    | 0                            | -5.75                       | -5.75            |
| -3.45                    | 0               | 0                            | -3.45                       | -3.45            | 0                    | 0                            | -3.45                       | -3.45            |
| 3.45                     | 0               | 0                            | 3.45                        | 3.45             | 0                    | 0                            | 3.45                        | 3.45             |
| 5.75                     | 0               | 0                            | 5.75                        | 5.75             | 0                    | 0                            | 5.75                        | 5.75             |

Table S5. Sensitivity analysis for temperature.

| T Increment (%) | Batch operation |                              |                             |                  | Continuous operation |                              |                             |                  |
|-----------------|-----------------|------------------------------|-----------------------------|------------------|----------------------|------------------------------|-----------------------------|------------------|
|                 | $\Delta i$ (%)  | $\Delta V_{\text{cell}}$ (%) | $\Delta n_{\text{H}_2}$ (%) | $\Delta Q_T$ (%) | $\Delta i$ (%)       | $\Delta V_{\text{cell}}$ (%) | $\Delta n_{\text{H}_2}$ (%) | $\Delta Q_T$ (%) |
| 16              | 1.28            | -1.26                        | 1.28                        | 4.27             | 2.54                 | -2.48                        | 2.54                        | 14.54            |
| 28              | 3.99            | -3.84                        | 3.99                        | 12.99            | 3.78                 | -3.64                        | 3.78                        | 24.82            |
| 32              | 6.96            | -6.51                        | 6.96                        | 19.00            | 4.55                 | -4.35                        | 4.55                        | 34.66            |
| 40              | 15.98           | -13.78                       | 15.98                       | 34.11            | 5.08                 | -4.84                        | 5.08                        | 81.09            |
